# Supplementary material for: Ultrahigh sensitivity assays for human cardiac troponin I using TiO2 nanotube arrays
Source: Royal Society of Chemistry journal article supplement (doi:10.1039/c2lc20892j), 2012-01-01
Supplement: c2lc20892j.pdf [file c2lc20892j.pdf]

SUPPORTING INFORMATION FOR

**High Sensitivity Assays for Human Cardiac Troponin I using TiO<sub>2</sub> nanotube arrays**

Piyush Kar<sup>2</sup>, Archana Pandey<sup>1,2</sup>, John J. Greer<sup>1</sup> and Karthik Shankar<sup>2</sup>

<sup>1</sup>Department of Physiology, University of Alberta, Edmonton, AB, Canada

<sup>2</sup>Department of Electrical and Computer Engineering, University of Alberta, Edmonton, AB, Canada

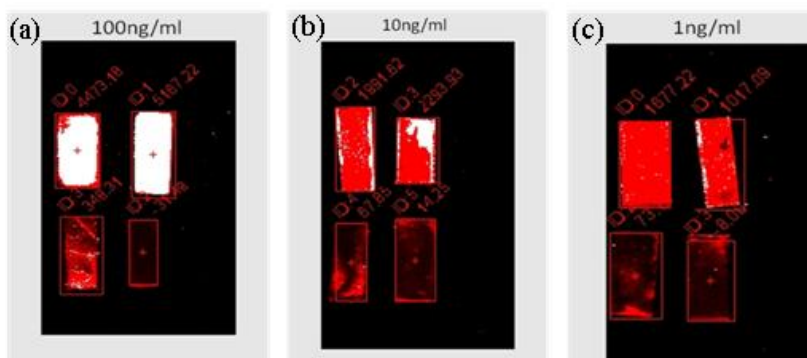

Figure S1 : Fluorescence microscope images (Odyssey imaging system) of assays for (a) 100 ng/ml, (b) 10 ng/ml and (c) 1 ng/ml of cTnI using nanotubes grown in aqueous electrolytes. In each image, the top two samples are the assays while the bottom two samples are controls exposed to 0 ng/ml troponin. Although the concentration is increased logarithmically, the fluorescence counts increase linearly.

Table S2: Variation of troponin concentration with fluorescence intensity for aqueous nanotube array samples (number of samples n = 48)

| Troponin Concentration (ng/ml) | Average normalized intensity | Standard deviation |
|--------------------------------|------------------------------|--------------------|
| 100                            | 54.65                        | 2.73               |
| 10                             | 39.10                        | 1.96               |

|     |       |      |
|-----|-------|------|
| 1   | 26.89 | 1.34 |
| 0.9 | 19.64 | 0.98 |
| 0.8 | 18.93 | 0.94 |
| 0.7 | 13.46 | 0.67 |
| 0.6 | 10.91 | 0.55 |
| 0.5 | 8.33  | 0.42 |
| 0.4 | 7.1   | 0.36 |
| 0.3 | 5.43  | 0.27 |
| 0.2 | 4.56  | 0.23 |
| 0.1 | 3.87  | 0.19 |

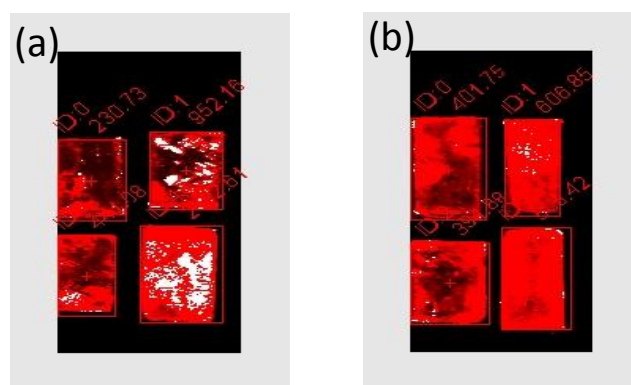

Figure S3: Fluorescence images of ethylene glycol TiO<sub>2</sub> NTs samples with (a) 0.05 ng/ml and (b) 0.01 ng/ml of cTnI. In each image, the two samples on the right are the assays while the two samples on the left are controls exposed to 0 ng/ml troponin. In (a) the S/N ratio is greater than the threshold of 4 set by us for detection. In (b) the S/N ratio is lower than the threshold for detection

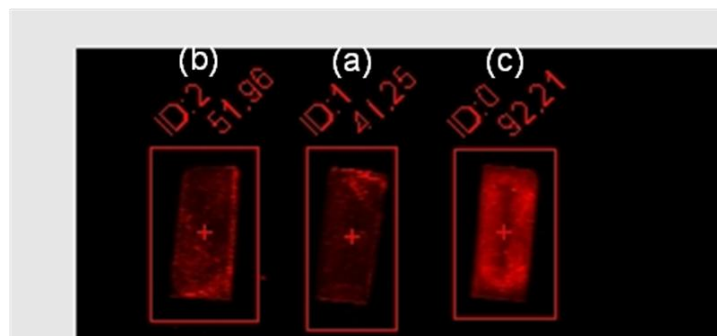

Figure S4: cTnI detection with ethanolamine+BSA blocking using TiO<sub>2</sub> NTs samples grown in DMSO-based electrolyte at 7.5 V (a) 0 pg/ml (b) 0.01 pg/ml and (b) 0.1 pg/ml. We see that after blocking by ethanolamine+BSA, S/N ratio > 4 is not achieved

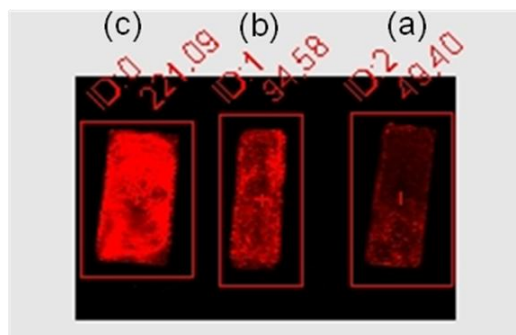

Figure S5: cTnI detection with Tween20+BSA blocking using TiO<sub>2</sub> NTs samples grown in DMSO-based electrolyte at 7.5 V (a) 0 pg/ml (b) 0.01 pg/ml and (b) 0.1 pg/ml. We see that after blocking by Tween20+BSA, S/N ratio > 4 is indeed achieved for 0.1 pg/ml, which forms the detection limit achieved by us in the present study.

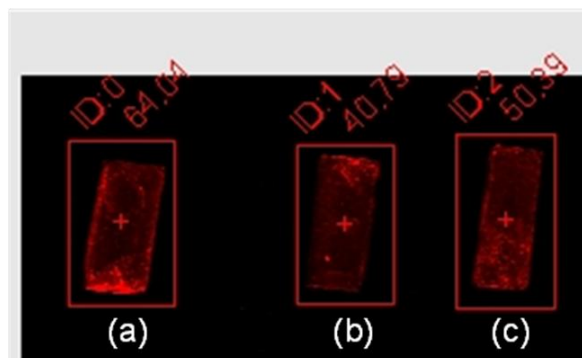

Figure S6: Zero troponin control samples using TiO<sub>2</sub> NTs samples grown in DMSO-based electrolyte at 7.5 V (a) BSA blocking (b) Tween20+BSA blocking and (c) ethanolamine+BSA

blocking. We see that non-specific binding flows the order : BSA > ethanolamine+BSA > Tween20+BSA.
